# Supplementary material for: Co-based nanowire films as complementary hydrogen- and oxygen-evolving electrocatalysts in neutral electrolyte
Source: Royal Society of Chemistry journal article supplement (doi:10.1039/c7cy00703e), 2017-01-01
Supplement: c7cy00703e1.pdf [file c7cy00703e1.pdf]

## Electronic Supplementary Information

### Experimental Section

**Materials:**  $\text{NH}_4\text{F}$ ,  $\text{KH}_2\text{PO}_4$ ,  $\text{K}_2\text{HPO}_4$  and urea were purchased from Beijing Chemical Corp.  $\text{Co}(\text{NO}_3)_2 \cdot 6\text{H}_2\text{O}$  was purchased from Aladdin Ltd (China). Ti mesh was purchased from Hangxu filter flagship store. Pt/C (10 wt% Pt) was purchased from Alfa Aesar (China) Chemicals Co. Ltd.  $\text{RuCl}_3 \cdot 3\text{H}_2\text{O}$  and Nafion (5 wt%) were purchased from Sigma-Aldrich Chemical Reagent Co. Ltd. All the reagents were used as received without further purification. The water used throughout all experiments was purified through a Millipore system.

**Preparation of Co(OH)F/TM:** Co(OH)F was prepared as follows. In a typical synthesis,  $\text{Co}(\text{NO}_3)_2 \cdot 6\text{H}_2\text{O}$  (1 mmol),  $\text{NH}_4\text{F}$  (2 mmol) and urea (5 mmol) were dissolved in 25 mL water under vigorous stirring for 20 min. Then the solution was transferred into a Teflon-lined stainless autoclave (30 mL), and a piece of Ti mesh (3 cm × 2 cm) was immersed into the autoclave contained solution. The autoclave was sealed and maintained at 105 °C for 5 h in an electric oven. After the autoclave cooled down naturally, the resulting Co(OH)F/TM was taken out and washed with ultrapure water and dried at 60 °C.

**Preparation of Co<sub>2</sub>N/TM:** To prepare Co<sub>2</sub>N/TM, Co(OH)F/TM was placed in the furnace and heated to 420 °C for 2 h with a heating speed of 5 °C min<sup>-1</sup> under a flowing NH<sub>3</sub> atmosphere. The system was allowed to cool down to room temperature naturally still under a flowing NH<sub>3</sub> atmosphere. Finally, the black Co<sub>2</sub>N/Ti was collected for further characterization. The loading for Co<sub>2</sub>N on Ti mesh was determined to be 1.08 mg cm<sup>-2</sup>.

**Preparation of Co-Pi/TM:** The Co-Pi/TM was formed with a rapid electrochemical transformation. Co<sub>2</sub>N /TM electrode (0.5 × 0.5 cm) was used as the working electrode, Pt wire as the auxiliary electrode and SCE electrode as the reference electrode. the as-prepared Co<sub>2</sub>N/TM was activated for 500 cycles by cyclic voltammetry with the potential ranges from 0.8 V to 1.2 V vs. SCE in 0.1 M PBS at pH 7.4.

**Preparation of RuO<sub>2</sub>:** RuO<sub>2</sub> was prepared according to previous report.<sup>1</sup> Briefly,

2.61 g  $\text{RuCl}_3 \cdot 3\text{H}_2\text{O}$  and 1.0 mL NaOH (1.0 M) were added into 100 mL distilled water and stirred for 45 min at 100 °C. Then the solution was centrifuged for 10 minutes and filtered. The precipitate was collected and washed with water several times. Finally, the product was dried at 80 °C overnight and then annealed at 300 °C in air for 3 h.

**Characterizations:** XRD data were collected on a Rigaku X-ray diffractometer equipped with a Cu  $\text{K}\alpha$  radiation source. Scanning electron microscopy (SEM) measurements were performed on a Hitachi S-4800 field emission scanning electron microscope at an accelerating voltage of 20 kV. Transmission electron microscopy (TEM) measurements were carried out on a Zeiss Libra 200FE transmission electron microscope operated at 200 kV. X-ray photoelectron spectroscopy (XPS) measurements were performed on an ESCALABMK II X-ray photoelectron spectrometer using Mg as the exciting source. ICP-MS analysis was performed on ThermoScientific iCAP6300.

**Electrochemical measurements:** Electrochemical measurements were performed with a CHI 660E electrochemical analyzer (CH Instruments, Inc., Shanghai) in a standard three-electrode system, using a Co-Pi/TM as the working electrode, a Pt wire as the counter electrode and a SCE as the reference electrode. The potentials reported in this work were calibrated to RHE, using the following equation:  $E(\text{RHE}) = E(\text{SCE}) + 0.242 + 0.059 \times \text{pH}$  V. Polarization curves were obtained using linear sweep voltammetry with a scan rate of 2  $\text{mV s}^{-1}$ . All experiments were carried out at room temperature ( $\sim 25$  °C).

**Computational Methods:** All the density-functional theory (DFT) calculations in this study were performed using the Vienna *ab initio* simulation package (VASP).<sup>2-4</sup> We used the PBE functional for the exchange-correlation energy<sup>5</sup> and projector augmented wave (PAW) potentials.<sup>6,7</sup> The kinetic energy cutoff in the calculation was set to 450 eV. The ionic relaxation was performed until the force on each atom is less than 0.03 eV/Å and convergence criteria of total energy were set to  $10^{-4}$  eV. The  $3 \times 3 \times 1$  k-points meshes were sampled based on the Monkhorst-Pack method.<sup>8</sup> The Hubbard U parameter (GGA+U) with  $U = 4$  eV was used to calculate the electron

correlation within the Co ions. The simulations performed were based on the five-layer thick Co<sub>2</sub>N(111) surface and a Co-Pi layer model structure with H atoms to saturate the dangling bonds of O atoms.<sup>9</sup> To minimize the undesired interactions between images, a vacuum of at least 15 Å was considered along the z axis.

Previous studies have shown that the OER activity is strongly correlated with the free energy of O\*, OH\* and OOH\* binding to the electrocatalysts surface. The four step OER mechanism is proposed as:

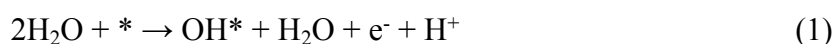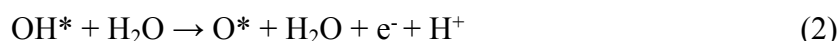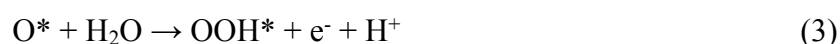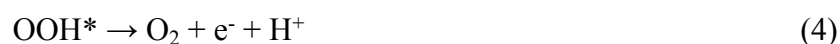

The free energy ( $\Delta G_i$ ) for O\*, OH\* and OOH\* adsorption on Co-Pi and surfaces was calculated as follows:

$$\Delta G_i = \Delta E_i + \Delta E_{\text{ZPE}} - T\Delta S \quad (5)$$

where  $\Delta E_i$  is the reaction energy for each elementary step,  $\Delta E_{\text{ZPE}}$  is the zero-point energy change and  $\Delta S$  is the entropy change. The theoretical overpotential can be defined as:

$$\eta = \max[\Delta G_1, \Delta G_2, \Delta G_3, \Delta G_4] / e - 1.23 \text{ [V]} \quad (6)$$

**Determination of Faradaic efficiency (FE):** The generated gas was confirmed by gas chromatography (GC) analysis and measured quantitatively using a calibrated pressure sensor to monitor the change of pressure in the anode and cathode compartment of a H-type electrolytic cell. The FE was calculated by comparing the amount of experimentally quantified gas with theoretically calculated (assuming 100% FE). GC analysis was carried out on GC-2014C with thermal conductivity detector and nitrogen carrier gas. Pressure data during electrolysis were recorded using a CEM DT-8890 Differential Air Pressure Gauge Manometer Data Logger Meter Tester with a sampling interval of 1 point per second.

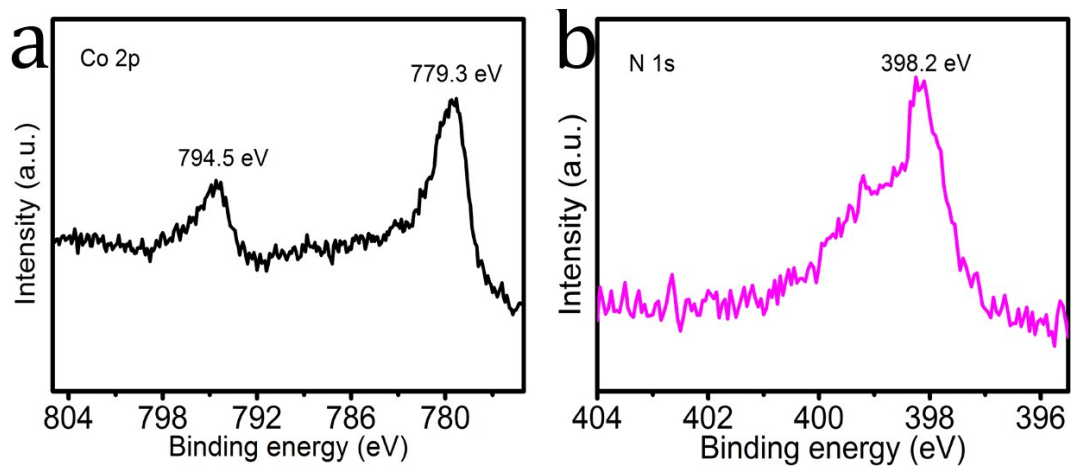

**Fig. S1.** XPS spectra of Co<sub>2</sub>N in (a) Co 2p, and (b) N 1s regions.

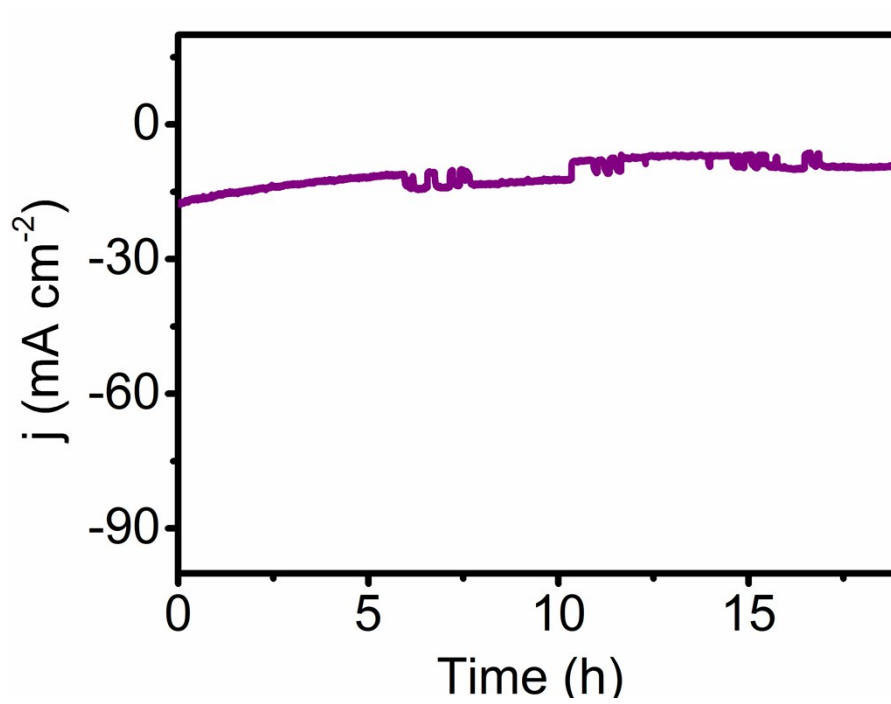

**Fig. S2.** Time-dependent current density curve of Pt/C under static overpotential in 1.0 M PBS.

**Table S1.** Comparison of HER performance for Co<sub>2</sub>N/TM with other non-noble-metal electrocatalysts in neutral media.

| Catalyst                  | j (mA cm <sup>-2</sup> ) | $\eta$ (mV) | Electrolyte | Ref.      |
|---------------------------|--------------------------|-------------|-------------|-----------|
| Co <sub>2</sub> N/TM      | 2                        | 142         | 1.0 M PBS   | This work |
|                           | 5                        | 246         |             |           |
|                           | 10                       | 290         |             |           |
| WO <sub>3</sub> NAs/CC    | 2                        | 186         | 1.0 M PBS   | 10        |
|                           | 10                       | 302         |             |           |
| CoO/CoSe <sub>2</sub>     | 10                       | 337         | 0.5 M PBS   | 11        |
| H <sub>2</sub> -CoCat/FTO | 2                        | 385         | 0.5 M PBS   | 12        |
| CuMoS <sub>4</sub> /FTO   | 2                        | 210         | 0.1 M PBS   | 13        |
| Cu-EA                     | 2                        | 270         | 0.1 M PBS   | 14        |
| Co-NRCNTs                 | 2                        | 380         | 0.1 M PBS   | 15        |
|                           | 10                       | 540         |             |           |
| Co-Mo-S film              | 1.04                     | 200         | PBS         | 16        |
| Mo <sub>2</sub> C         | 1                        | 200         | PBS         | 17        |
| CoP/CC                    | 2                        | 65          | 1.0 M PBS   | 18        |
|                           | 10                       | 106         |             |           |

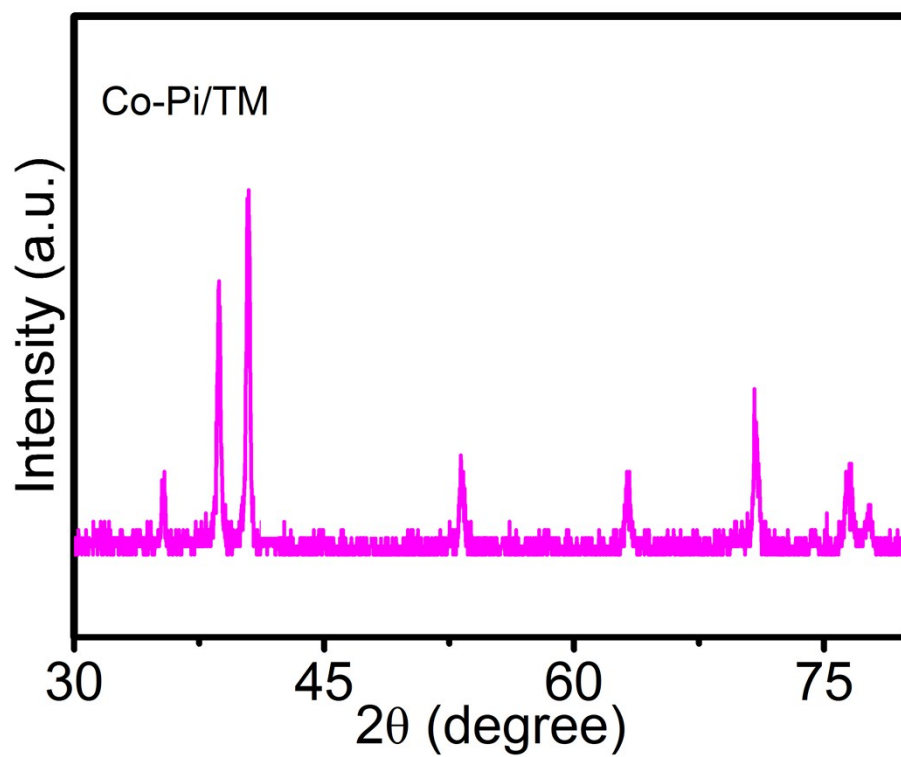

**Fig. S3.** XRD pattern for Co-Pi/TM.

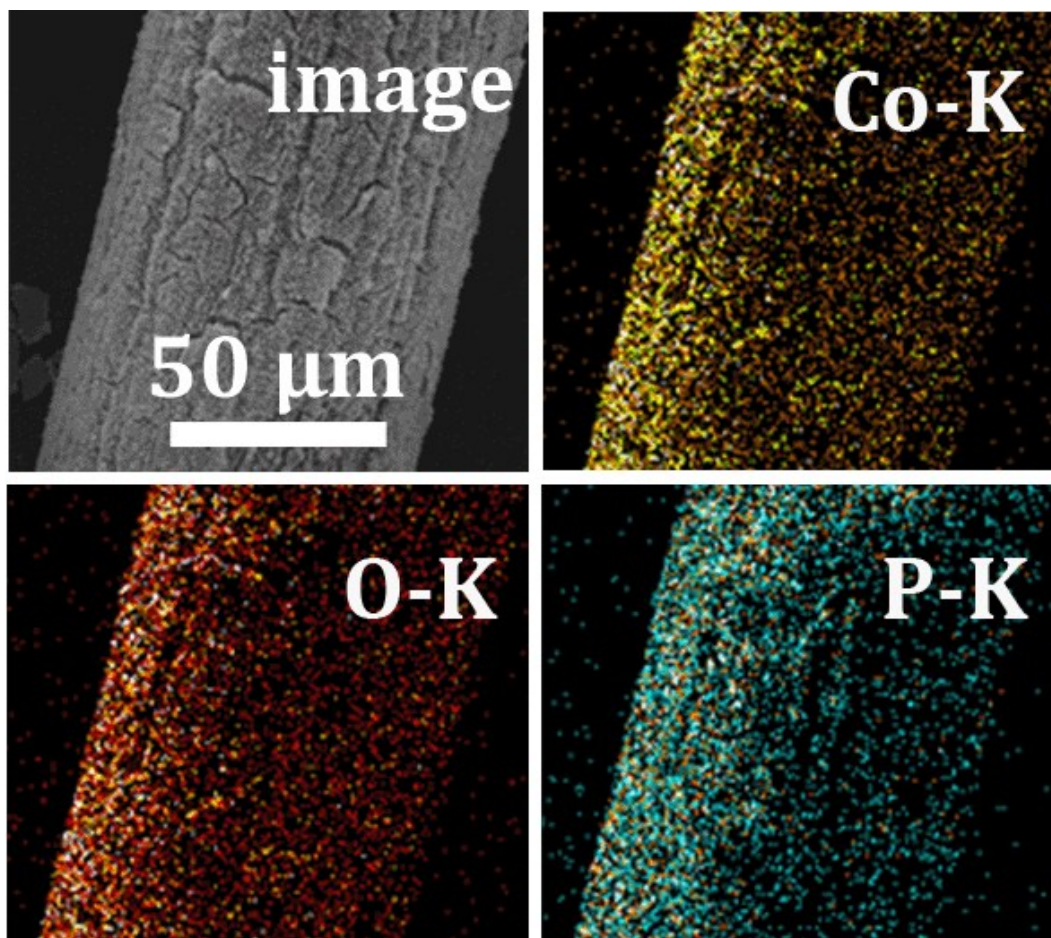

**Fig. S4.** Energy-dispersive X-ray (EDX) elemental mapping analysis of Co-Pi.



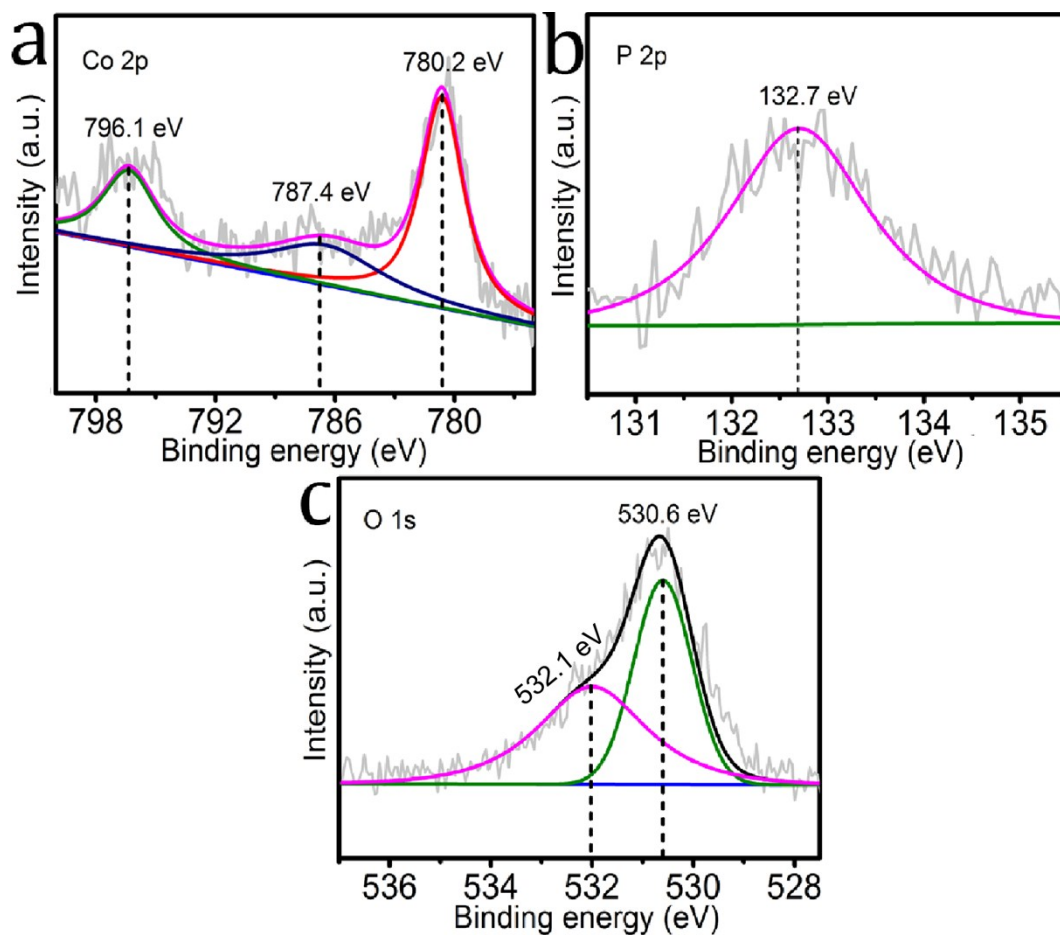

**Fig. S5.** XPS spectra of Co-Pi in (a) Co 2p, (b) P 2p, and (c) O 1s regions.

**Table S2.** Comparison of OER performance for Co-Pi/TM with other non-noble-metal electrocatalysts in neutral media.

| Catalyst                                        | j (mA cm <sup>-2</sup> ) | $\eta$ (mV) | Electrolyte (PBS) | Ref.      |
|-------------------------------------------------|--------------------------|-------------|-------------------|-----------|
| Co-Pi/TM                                        | 5                        | 302         | 0.1 M             | This work |
|                                                 | 10                       | 430         |                   |           |
|                                                 | 10                       | 413         | 0.3 M             |           |
|                                                 | 10                       | 300         | 1.0 M             |           |
| Co-Pi/TM                                        | 10                       | 450         | 0.1 M             | 19        |
| Co-Pi/ITO                                       | 1                        | 410         | 0.1 M             | 20        |
| Co-Pi/FTO                                       | 0.43                     | 420         | 0.1 M             | 21        |
| Co-Pi/ITO                                       | 1                        | 483         | 0.1 M             | 22        |
| Co-Pi film                                      | 0.63                     | 483         | 0.1 M             | 23        |
| CoCat                                           | 1                        | 813         | 0.1 M             | 24        |
| NGCO                                            | 1                        | 410         | 0.1 M             | 25        |
| CoPi/GO                                         | 0.23                     | 780         | 0.1 M             | 26        |
| Fe-based film                                   | 1                        | 480         | 0.1 M             | 27        |
| Ni-Gly                                          | 1                        | 480         | 0.5 M             | 28        |
| Mn <sub>5</sub> O <sub>8</sub>                  | 5                        | 580         | 0.3 M             | 29        |
| MnO <sub>x</sub>                                | 1                        | 580         | 0.1 M             | 30        |
| Li <sub>2</sub> Co <sub>2</sub> O <sub>4</sub>  | 1                        | 545         | 0.1 M             | 31        |
| Co-Ni LDH                                       | 1                        | 490         | 0.1 M             | 32        |
| Co(PO <sub>3</sub> ) <sub>2</sub>               | 10                       | 590         | 0.1 M             | 33        |
| Co <sub>3</sub> O <sub>4</sub> /MWNTs           | 1                        | 400         | 0.1 M             | 34        |
| Co <sub>3</sub> S <sub>4</sub>                  | 3                        | 620         | 0.1 M             | 35        |
| Sub-MnO <sub>x</sub>                            | 1                        | 420         | 0.3 M             | 36        |
| Mn <sub>3</sub> (PO <sub>4</sub> ) <sub>2</sub> | 0.32                     | 680         | 0.5 M             | 37        |
| LiMnP <sub>2</sub> O <sub>7</sub>               | 0.5                      | 680         | 0.5 M             | 38        |
| Cu-doped CCO                                    | 1                        | 653         | 0.1 M             | 39        |
| Co-W                                            | 1                        | 420         | 0.05 M            | 40        |
| Co(OH) <sub>2</sub>                             | 1                        | 710         | 0.1 M             | 41        |

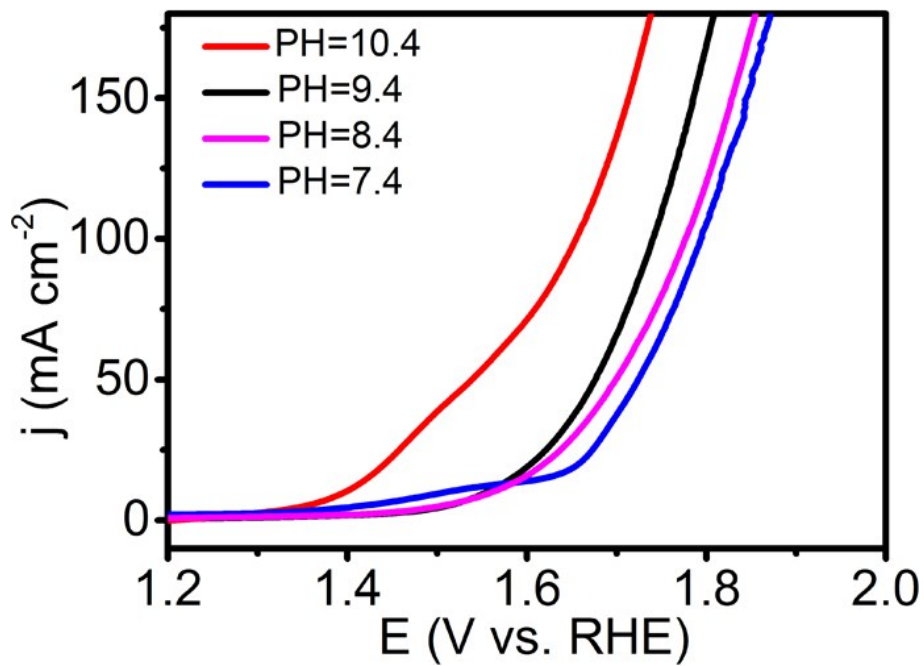

**Fig. S6.** LSV curves of Co-Pi/TM for OER in 1.0 M PBS with varied pH.

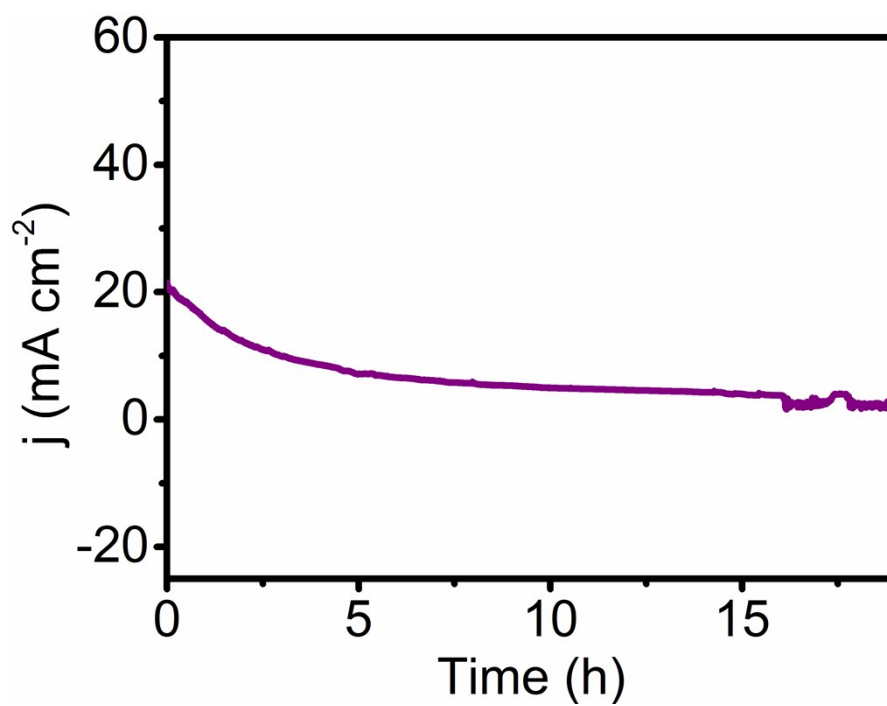

**Fig. S7.** Time-dependent current density curve of  $\text{RuO}_2/\text{TM}$  under static overpotential in 1.0 M PBS.

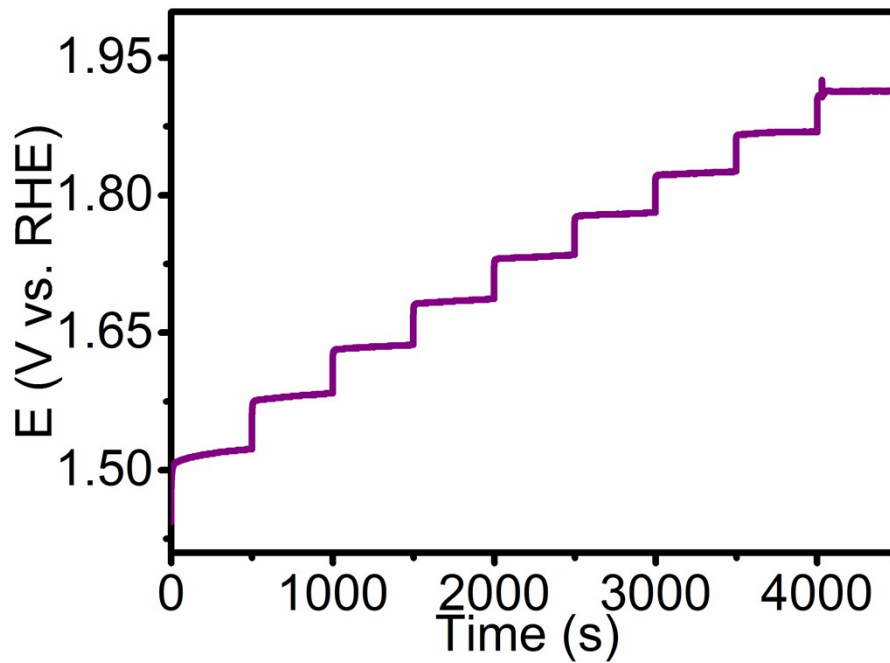

**Fig. S8.** Multi-current process of Co-Pi/TM in 1.0 M PBS. The current density started at  $10 \text{ mA cm}^{-2}$  and ended at  $100 \text{ mA cm}^{-2}$ , with an increment of about  $10 \text{ mA cm}^{-2}$  per 500 s without  $iR$  correction.

**Movie S1.** Overall water electrolysis at the voltage of 1.78 V employing Co<sub>2</sub>N/TM as cathode and Co-Pi/TM as anode.

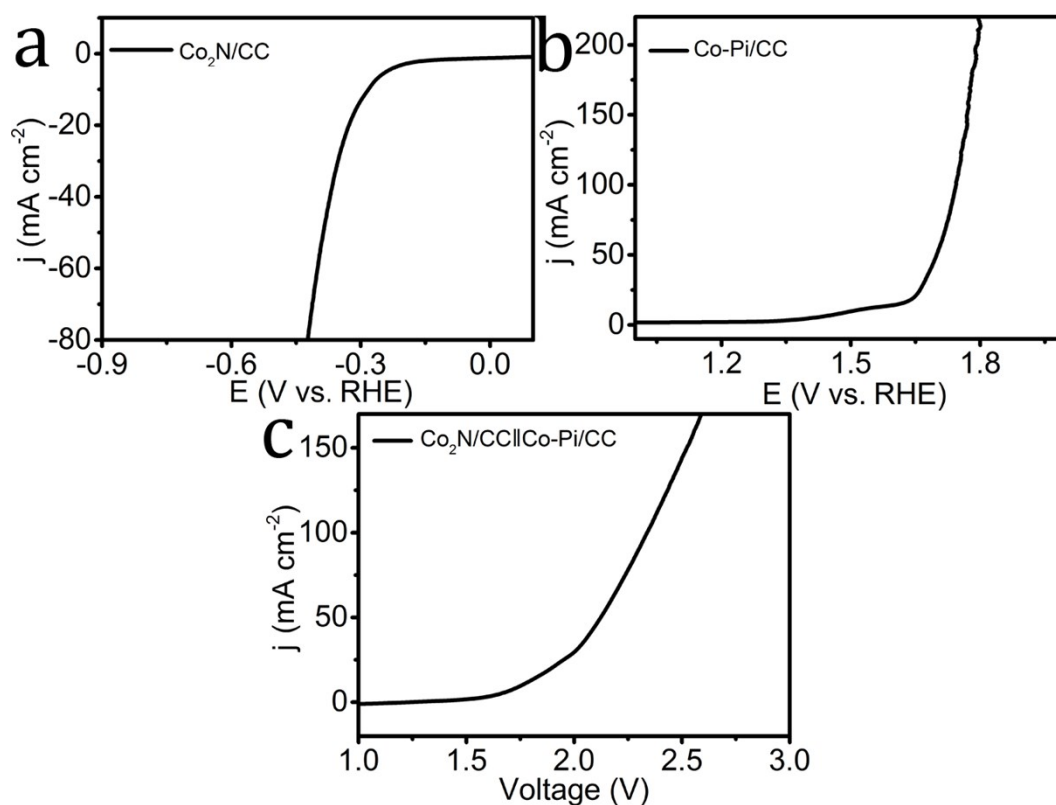

**Fig. S9.** Polarization curve of Co<sub>2</sub>N/CC for (a) HER and (b) OER. (c) Polarization curve of Co<sub>2</sub>N/CC||Co-Pi/CC for full water splitting with a scan rate of 2 mV s<sup>-1</sup>. All experiments were carried out in 1.0 M PBS.

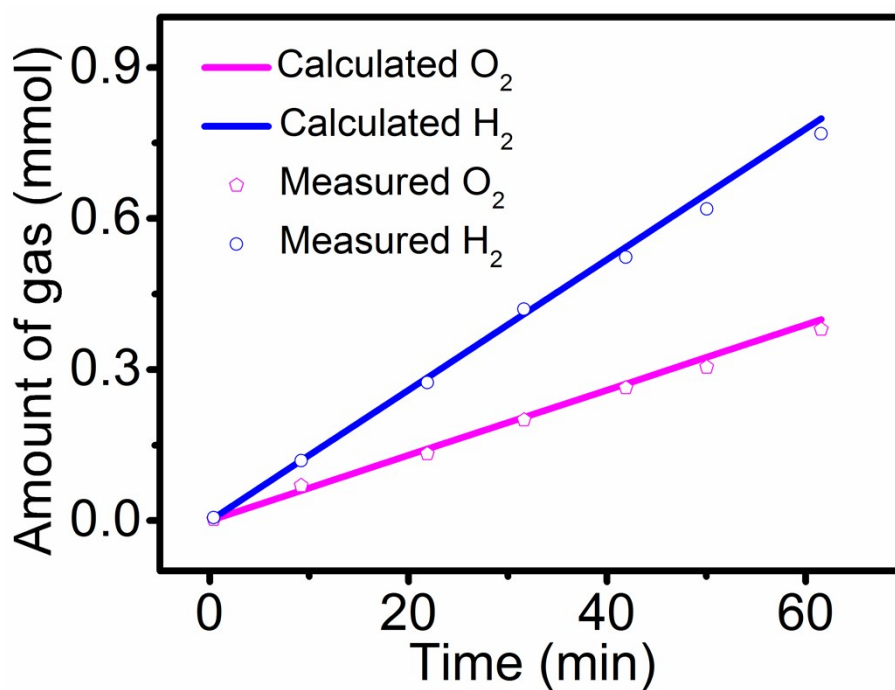

**Fig. S10.** The amount of gas theoretically calculated and experimentally measured vs. time for overall water splitting of  $\text{Co}_2\text{N}/\text{TM}||\text{Co-Pi}/\text{TM}$ .

## References

- 1 J. C. Cruz, V. Baglio, S. Siracusano, V. Antonucci, A. S. Aricò, R. Ornelas, L.



- Ortiz-Frade, G. Osorio-Monreal, S. M. Durón-Torres and L.G. Arriaga, *Int. J. Electrochem. Sci.*, 2011, **6**, 6607-6619.
- 2 G. Kresse and J. Furthmuller, *Comp. Mater. Sci.*, 1996, **6**, 15-50.
- 3 G. Kresse and J. Furthmuller, *Phys. Rev. B*, 1996, **54**, 11169-11186.
- 4 G. Kresse and J. Hafner, *Phys. Rev. B*, 1994, **49**, 14251-14269.
- 5 J. P. Perdew, K. Burke and M. Ernzerhof, *Phys. Rev. Lett.*, 1997, **78**, 1396-1396.
- 6 G. Kresse and D. Joubert, *Phys. Rev. B*, 1999, **59**, 1758-1775.
- 7 P. E. Blochl, *Phys. Rev. B*, 1994, **50**, 17953-17979.
- 8 H. J. Monkhorst and J. D. Pack, *Phys. Rev. B*, 1976, **13**, 5188-5192.
- 9 A. Riou, Y. Cudennec and Y. Gerault, *Acta Crystallographica C*, 1989, **45**, 1412-1413.
- 10 J. Shi, Z. Pu, Q. Liu, A. M. Asiri, J. Hu and X. Sun, *Electrochimica Acta*, 2015, **154**, 345-351.
- 11 K. Li, J. Zhang, R. Wu, Y. Yu and B. Zhang, *Adv. Sci.*, 2016, **3**, 1500426.
- 12 S. Cobol, J. Heidkamp, P. A. Jacques, J. Fize, V. Fourmond, L. Guetaz, B. Joussemme, V. Ivanova, H. Dau, S. Palacin, M. Fontecave and V. Artero, *Nat. Mater.*, 2012, **11**, 802-807.
- 13 P. D. Tran, M. Nguyen, S. S. Pramana, A. Bhattacharjee, S. Y. Chiam, J. Fize, M. J. Field, V. Artero, L. H. Wong, J. Loo and J. Barber, *Energy Environ. Sci.*, 2012, **5**, 8912-8916.
- 14 X. Liu, S. Cui, Z. Sun and P. Du, *Chem. Commun.*, 2015, **51**, 12954-12957.
- 15 X. Zou, X. Huang, A. Goswami, R. Silva, B. R. Sathe, Elis ĩka Mikmekov and Tewodros Asefa, *Angew. Chem., Int. Ed.*, 2014, **53**, 4372-4376.
- 16 D. Merki, H. Vrubel, L. Rovelli, S Fierro and X. Hu, *Chem. Sci.*, 2012, **3**, 2515-2525.
- 17 E. J. Popczun, C. G. Read, C. W. Roske, N. S. Lewis and R. E. Schaak, *Angew. Chem., Int. Ed.*, 2012, **51**, 12703-12706.
- 18 J. Tian, Q. Liu, A. M. Asiri and X. Sun, *J. Am. Chem. Soc.*, 2014, **136**, 7587-7590.
- 19 L. Xie, R. Zhang, L. Cui, D. Liu, S. Hao, Y. Ma, G. Du, A. M. Asiri and X. Sun, *Angew. Chem., Int. Ed.*, 2017, **129**, 1084-1088.

- 20 M. W. Kanan and D. G. Nocera, *Science*, 2008, **312**, 1072-1075.
- 21 E. R. Young, D. G. Nocera and V. Bulović, *Energy Environ. Sci.*, 2010, **3**, 1726-1728.
- 22 Y. Surendranath, M. Dinca and D. G. Nocera, *J. Am. Chem. Soc.*, 2009, **131**, 2615-2620.
- 23 M. W. Kanan, J. Yano, Y. Surendranath, M. Dincă, V. K. Yachandra and D. G. Nocera, *J. Am. Chem. Soc.*, 2010, **132**, 13692-3701.
- 24 D. González-Flores, I. Sánchez, I. Zaharieva, K. Klingan, J. Heidkamp, P. Chernev, P. W. Menezes, M. Driess, H. Dau and M. L. Montero, *Angew. Chem., Int. Ed.*, 2015, **54**, 2472-2476.
- 25 A. Vasileff, S. Chen and S. Qiao, *Nanoscale Horiz.*, 2016, **1**, 41-44.
- 26 J. Tian, H. Li, A. M. Asiri, A. O. Al-Youbi and X. Sun, *Small*, 2013, **9**, 2709-2714.
- 27 Y. Wu, M. Chen, Y. Han, H. Luo, X. Su, M. Zhang, X. Lin, J. Sun, L. Wang, L. Deng, W. Zhang and R. Cao, *Angew. Chem., Int. Ed.*, 2015, **54**, 4870-4875.
- 28 D. Wang, G. Ghirlanda and J. P. Allen, *J. Am. Chem. Soc.*, 2014, **136**, 10198-10201.
- 29 D. Jeong, K. Jin, S. E. Jerng, H. Seo, D. Kim, S. H. Nahm, S. H. Kim and K. T. Nam, *ACS Catal.*, 2015, **5**, 4624-4628.
- 30 I. Zaharieva, P. Chernev, M. Risch, K. Klingan, M. Kohlhoff, A. Fischer and H. Dau, *Energy Environ. Sci.*, 2012, **5**, 7081-7089.
- 31 G. P. Gardner, Y. B. Go, D. M. Robinson, P. F. Smith, J. Hadermann, A. Abakumov, M. Greenblatt and G. C. Dismukes, *Angew. Chem., Int. Ed.*, 2012, **51**, 1616-1619.
- 32 Y. Zhang, B. Cui, C. Zhao, H. Lin and J. Li, *Phys. Chem. Chem. Phys.*, 2013, **15**, 7363-7369.
- 33 H. S. Ahn and T. D. Tilley, *Adv. Funct. Mater.*, 2013, **23**, 227-233.
- 34 J. Wu, Y. Xue, X. Yan, W. Yan, Q. Cheng and Y. Xie, *Nano Res.*, 2012, **5**, 521-530.
- 35 Y. Liu, C. Xiao, M. Lyu, Y. Lin, W. Cai, P. Huang, W. Tong, Y. Zou and Y. Xie,

- Angew. Chem., Int. Ed.*, 2015, **54**, 11231-11235.
- 36 K. Jin, A. Chu, J. Park, D. Jeong, S. E. Jerng, U. Sim, H. Y. Jeong, C. W. Lee, Y. S. Park, K. D. Yang, G. K. Pradhan, D. Kim, N. E. Sung, S. H. Kim and K. T. Nam, *Sci. Rep.*, 2015, **5**, 10279.
- 37 K. Jin, J. Park, J. Lee, K. D. Yang, G. K. Pradhan, U. Sim, D. Jeong, H. L. Jang, S. Park, D. Kim, N. E. Sung, S. H. Kim, S. Han and K. T. Nam, *J. Am. Chem. Soc.*, 2014, **136**, 7435-7443.
- 38 J. Park, H. Kim, K. Jin, B. J. Lee, Y. S. Park, H. Kim, I. Park, K. D. Yang, H. Y. Jeong, J. Kim, K. T. Hong, H. W. Jang, K. Kang and K. T. Nam, *J. Am. Chem. Soc.*, 2014, **136**, 4201-4211.
- 39 Y. Zhang, B. Cui, O. Derr, Z. Yao, Z. Qin, X. Deng, J. Li and H. Lin, *Nanoscale*, 2014, **6**, 3376-3383.
- 40 B. Zhang, X. Wu, F. Li, F. Yu, Y. Wang and L. Sun, *Chem. Asian J.*, 2015, **10**, 2228-2233.
- 41 Y. Zhang, B. Cui, Z. Qin, H. Lin and J. Li, *Nanoscale*, 2013, **5**, 6826-6833.
